# Supplementary material for: Protective dissolution: generating secondary pores in zeolite by mechanochemical reaction
Source: Royal Society of Chemistry journal article supplement (doi:10.1039/d0ra00670j), 2020-01-01
Supplement: d0ra00670j1.pdf [file d0ra00670j1.pdf]

Supporting Information

## Protective Dissolution: Generating Secondary Pores in Zeolite by Mechanochemical Reaction

Ju Huang<sup>a</sup>, Yaqi Fan<sup>a</sup>, Guanqun Zhang<sup>\*a</sup>, Yanhang Ma<sup>\*a</sup>

<sup>a</sup> School of Physical Science and Technology, ShanghaiTech University, Shanghai 201210, China.

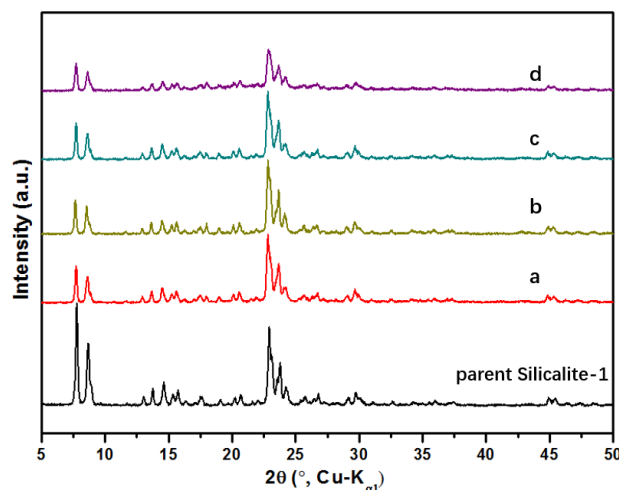

**Fig. S1** PXRd patterns of Silicalite-1 treated with different contents of NH<sub>4</sub>F alone in the solvent-free mechanochemical treatment: (a) NH<sub>4</sub>/SiO<sub>2</sub>=0.54, (b) NH<sub>4</sub>/SiO<sub>2</sub>=1.08, (c) NH<sub>4</sub>/SiO<sub>2</sub>=1.62, (d) NH<sub>4</sub>/SiO<sub>2</sub>=2.70.

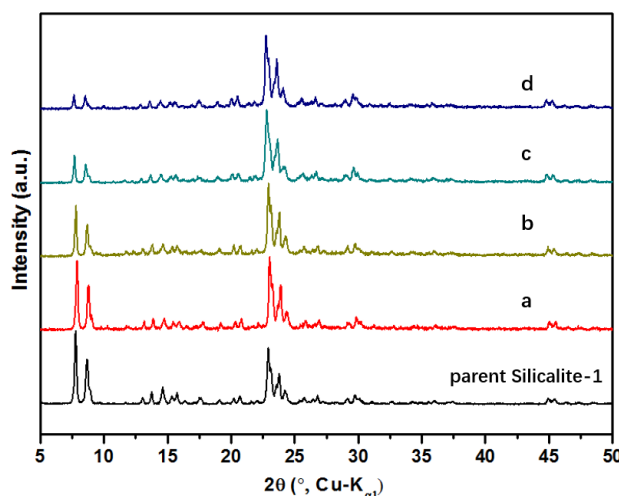

**Fig. S2** PXRd patterns of Silicalite-1 treated with different content TPABr alone in solvent-free mechanochemical treatment: (a) TPABr/SiO<sub>2</sub>=0.075, (b) TPABr/SiO<sub>2</sub>=0.15, (c) TPABr/SiO<sub>2</sub>=0.225, (d) TPABr/SiO<sub>2</sub>=0.375.

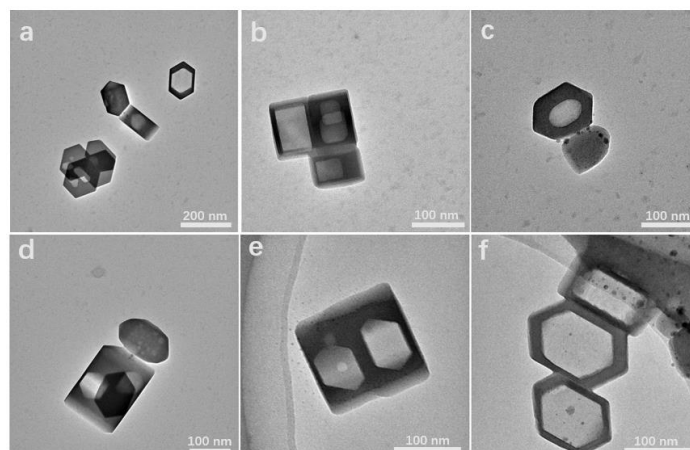

**Fig. S3** TEM images of Silicalite-1 treated with different content of  $\text{NH}_4\text{F}$ -TPABr in the solvent-free mechanochemical treatment: (a)  $\text{NH}_4/\text{SiO}_2=0.3$ ,  $\text{TPABr}/\text{SiO}_2=0.075$ ; (b)  $\text{NH}_4/\text{SiO}_2=0.6$ ,  $\text{TPABr}/\text{SiO}_2=0.075$ ; (c)  $\text{NH}_4/\text{SiO}_2=1.0$ ,  $\text{TPABr}/\text{SiO}_2=0.075$ ; (d)  $\text{NH}_4/\text{SiO}_2=0.54$ ,  $\text{TPABr}/\text{SiO}_2=0.10$ ; (e)  $\text{NH}_4/\text{SiO}_2=0.54$ ,  $\text{TPABr}/\text{SiO}_2=0.15$ ; (f)  $\text{NH}_4/\text{SiO}_2=0.54$ ,  $\text{TPABr}/\text{SiO}_2=0.225$ .

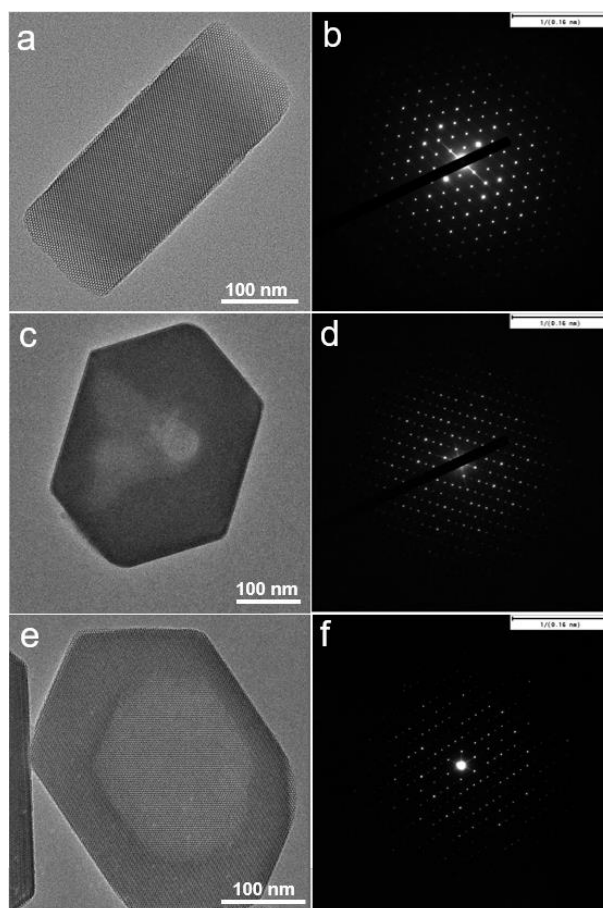

**Fig. S4** TEM images and SAED patterns of (a, b) pristine silicalite-1 zeolite, (c, d) ground products and (e, f) ground-heated sample.

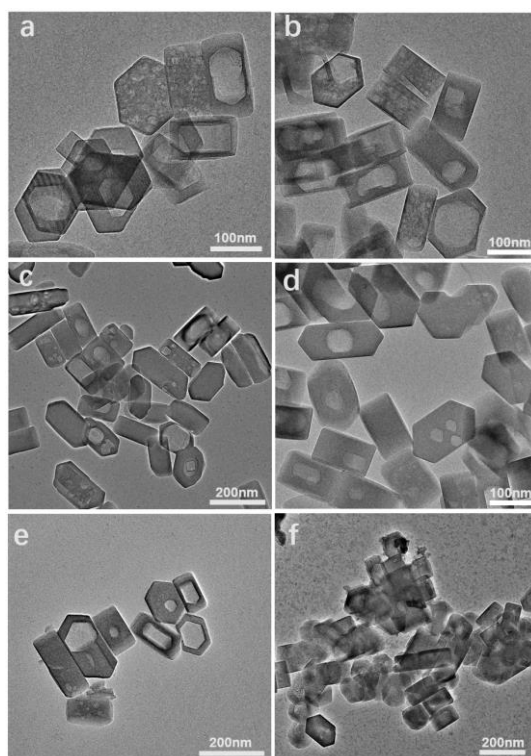

**Fig. S5** TEM images of Silicalite-1 treated by solvent-free method at 80 °C, 100 °C, 120 °C, 150 °C, 180 °C, 220 °C for 15 h.

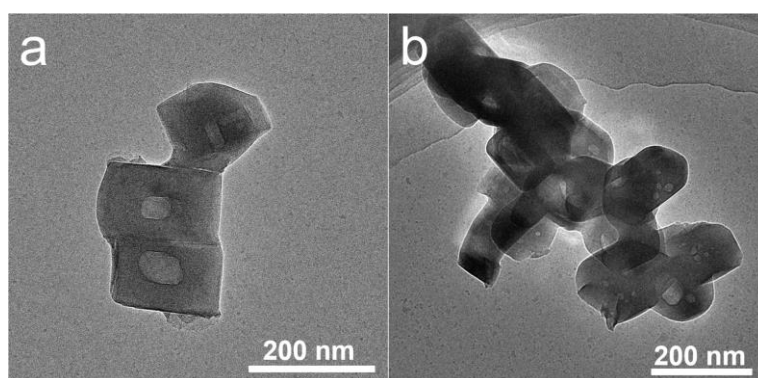

**Fig. S6** TEM images of Silicalite-1 treated by solvent-free method at 180 °C for 7 d.

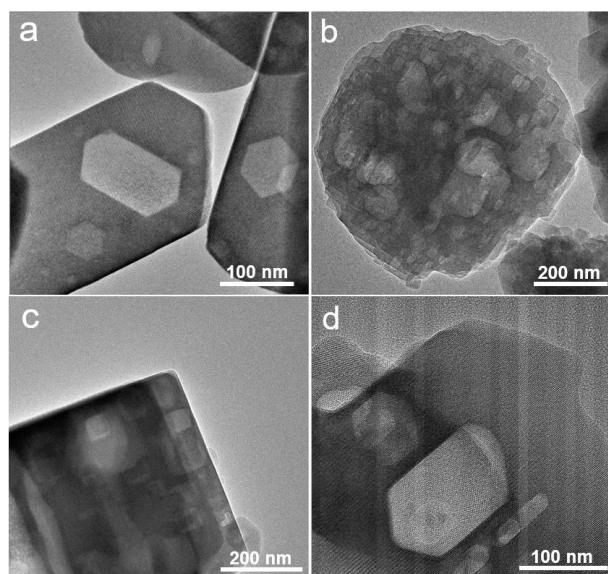

**Fig. S7** TEM images of commercial Silicalite-1(a), ZSM-5 with Si/Al =50 (b), ZSM-5 with Si/Al=14 (c), ZSM-5 with Si/Al=13 (d) treated by solvent-free method.

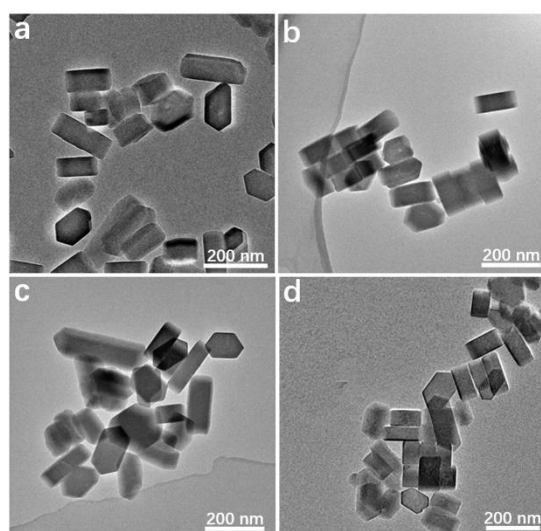

**Fig. S8** TEM images of Silicalite-1 treated with different contents of TPABr alone in the solvent-free mechanochemical treatment: (a) TPABr/SiO<sub>2</sub>=0.075, (b) TPABr/SiO<sub>2</sub>=0.15, (c) TPABr/SiO<sub>2</sub>=0.225, (d) TPABr/SiO<sub>2</sub>=0.375.

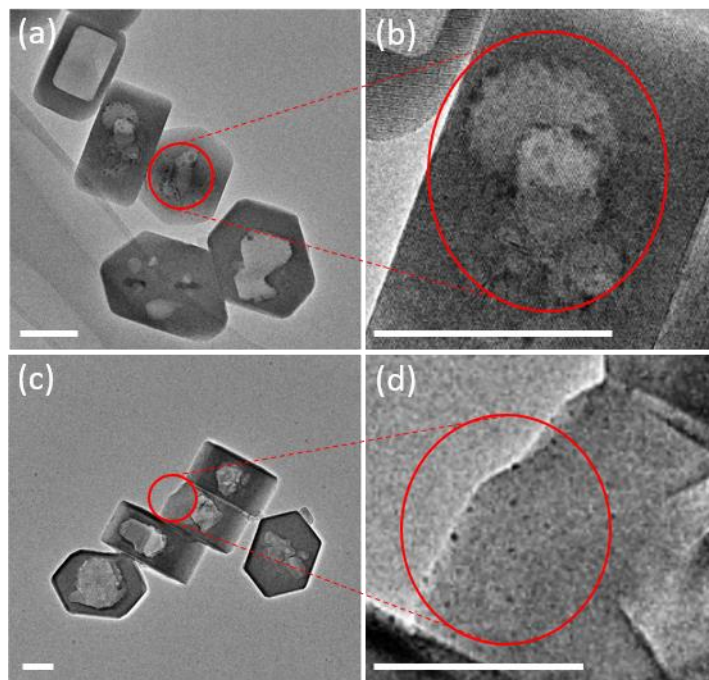

**Fig. S9** TEM images of (a, b) Co@Silicalite-1 and (c, d) Pd@Silicalite-1 after mixing and heating process but without calcination and reduction.

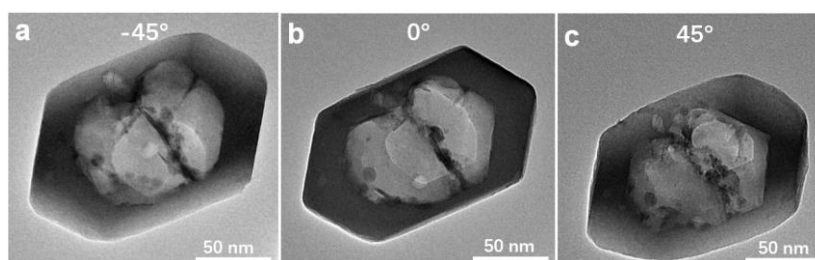

**Fig. S10** TEM images of Co@Silicalite-1 at different tilting angles.
